# Supplementary material
Source: PubMed Central journal article supplement (PMC130566)

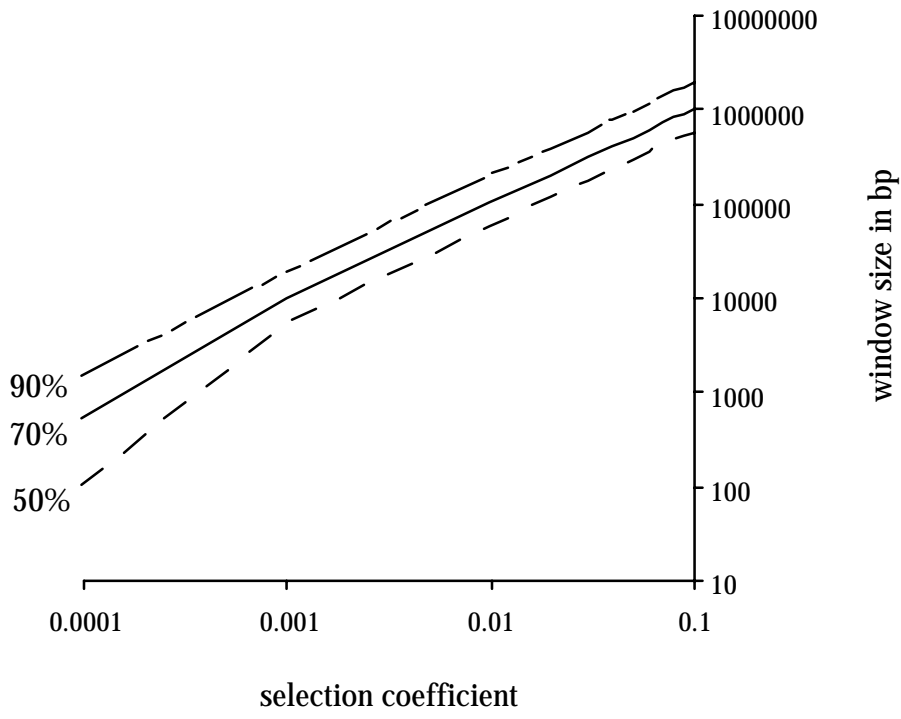

Supplement: pnas_202336899_7.pdf [file pnas_202336899_7.pdf]
